# Supplementary material for: Fast direct detection of natural dyes in historic and prehistoric textiles by flowprobe™-ESI-HRMS
Source: Royal Society of Chemistry journal article supplement (doi:10.1039/c6ra27842f), 2017-01-01
Supplement: c6ra27842f1.pdf [file c6ra27842f1.pdf]

## Supplementary Materials

### Fast direct detection of natural dyes in historic and prehistoric textiles by Flowprobe™-ESI-HRMS

Annemarie E. Kramell, <sup>a</sup> Alexander O. Brachmann, <sup>b</sup> Ralph Kluge, <sup>a</sup> Jörn Piel<sup>b</sup> and René Csuk<sup>a\*</sup>

<sup>a</sup> *Department of Organic Chemistry, Martin-Luther-University Halle-Wittenberg, Kurt-Mothes-Strasse 2, 06120 Halle, Germany*

<sup>b</sup> *Institute of Microbiology, Eidgenössische Technische Hochschule (ETH) Zürich, Vladimir-Prelog-Weg 1-5, 8093 Zürich, Switzerland*

\* Corresponding author.

*E-mail address:* rene.csuk@chemie.uni-halle.de (R. Csuk)

Characterization of dyestuff isomers by HPLC-DAD and LC-ESI-triple quadrupole MS/MS (for experimental details, see ref. <sup>1</sup>)

Besides carminic acid two other substances were detected in extracts of B and C as well as in extracts of the scale insect *Dactylopius coccus* Costa by LC-ESI-MS/MS, characterized by the presence of the quasi-molecular ion at  $m/z$  491 ( $[M-H]^-$ ) and by fragment ions at  $m/z$  447, 357 and 327 analogously to carminic acid. Most likely these compounds were isomers of the carminic acid [LC-ESI-MS/MS chromatogram:  $t_R$  (carminic acid) = 9.8 min;  $t_R$  (isomer 1 of carminic acid) = 10.6 min,  $t_R$  (isomer 2 of carminic acid) = 10.9 min, experimental conditions <sup>1</sup>]. The isolation and characterisation of isomers of carminic acid from *Dactylopius coccus* Costa has already been reported by Stathopoulou et al. and Lech et al.<sup>2, 3</sup>. The isomers, known as dcIV (7-C- $\alpha$ -D-glucofuranoside of kermesic acid) and dcVII (7-C- $\beta$ -D-glucofuranoside of kermesic acid), differ from carminic acid (7-C- $\alpha$ -D-glucopyranoside) in their sugar moiety and are minor constituents of the cochineal dye. Other minor constituents of the cochineal dye are dcII (7-C- $\alpha$ -D-glucopyranoside of flavokermesic acid) and dc1 (C-glucoside and isomer of dcII), characterized by the quasi-molecular ion at  $m/z$  475 ( $[M-H]^-$ ) and by fragment ions at  $m/z$  431, 341, 311. Extracts of the red-shaded samples B and C showed the same fragmentation pattern.

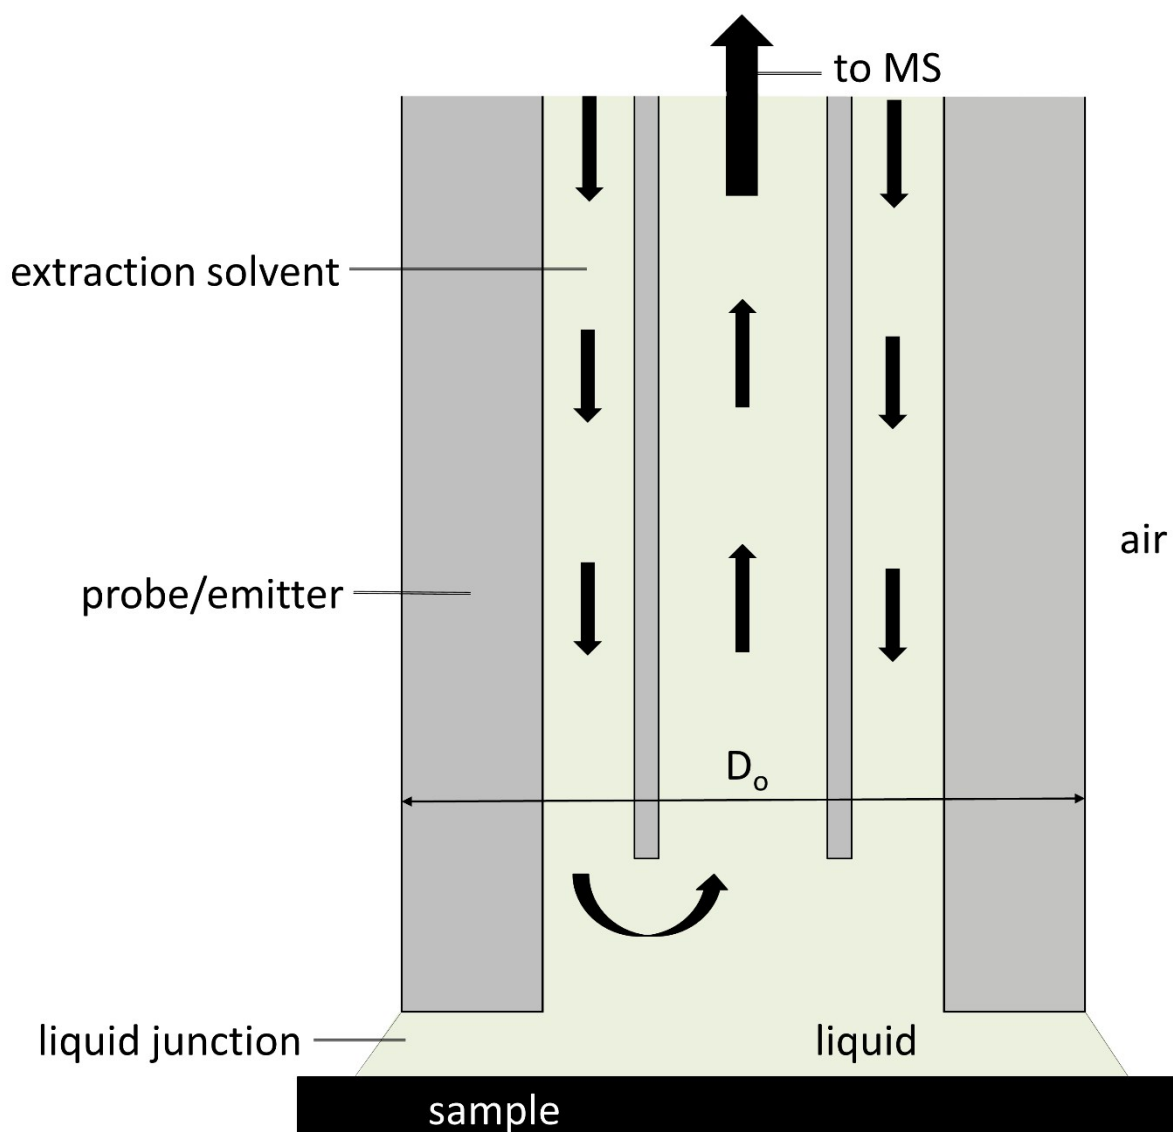

**Fig. S1.** Schematic illustration of a junction region from a flowprobe™-MS experimental setup with  $D_o = 630 \mu\text{m}$  ( $D_o$ : probe outer diameter).

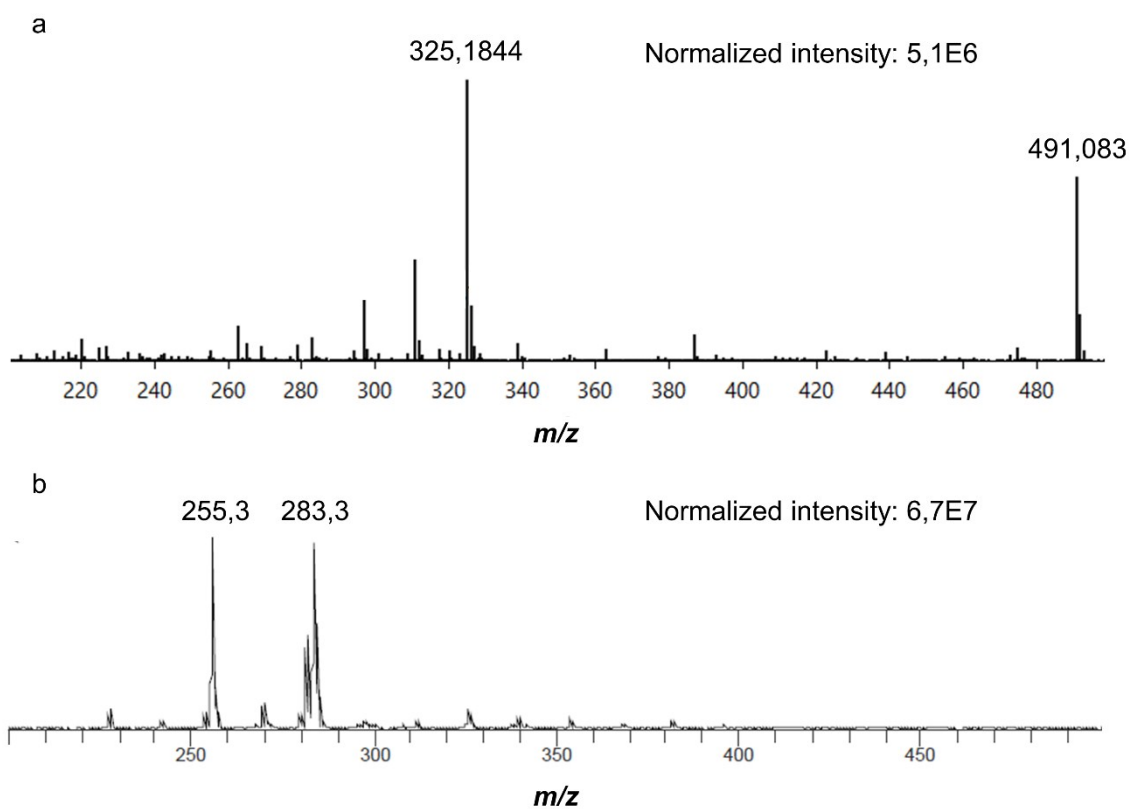

**Fig. S2.** (a) Flowprobe™ HRMS and (b) ASAP®-MS spectra (negative ion full-scan mode) of woolen reference fibers dyed with an extract of the scale insect *Dactylopius coccus* Costa (main constituent: carminic acid,  $[M-H]^-$  at  $m/z$  491.083).

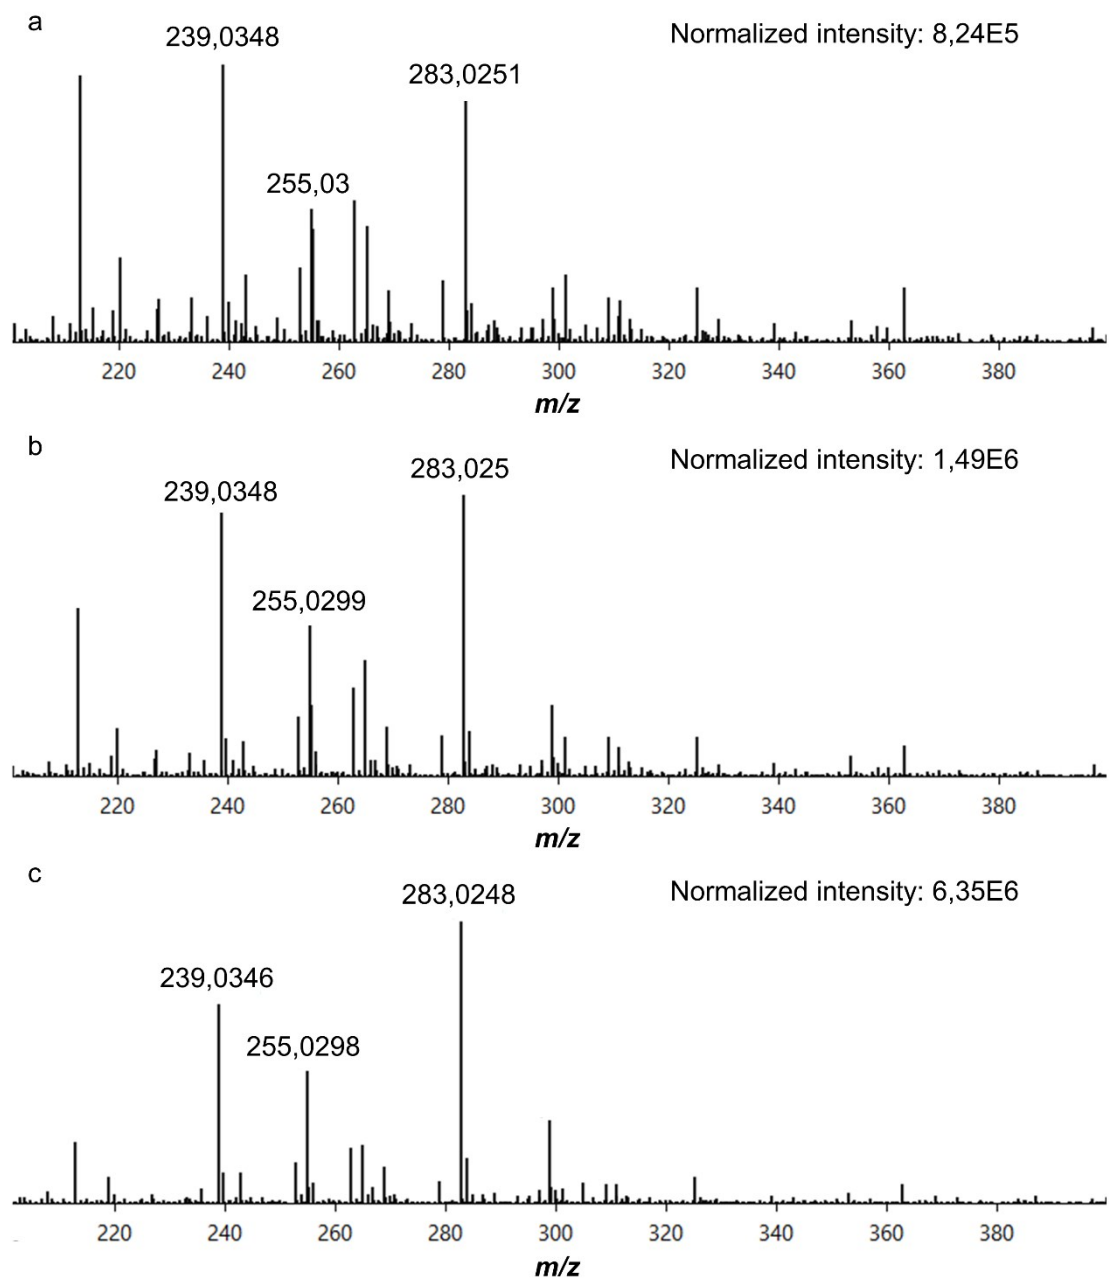

**Fig. S3.** Flowprobe™ HRMS spectra of silk material dyed with madder after (a) 0.6 min, (b) 1 min and (c) 2.2 min acquisition time (negative ion full-scan mode).

sample A

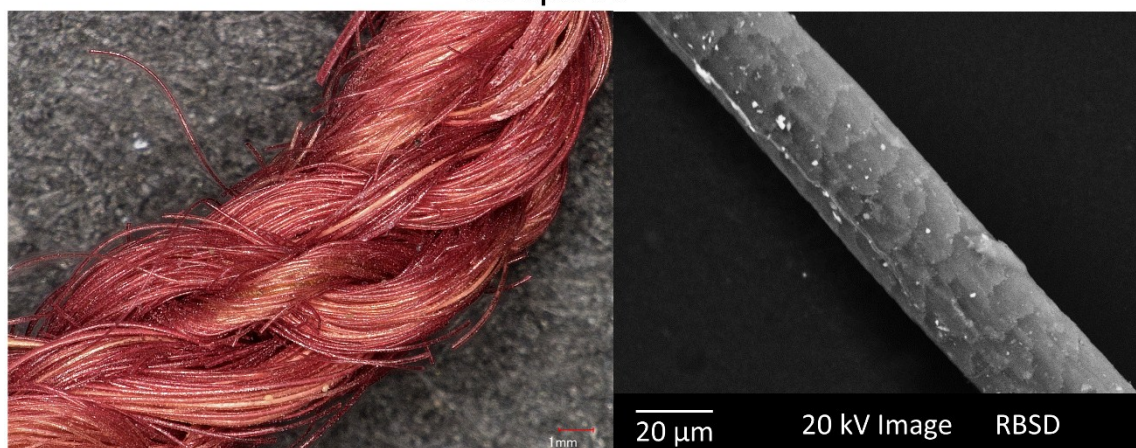

sample B

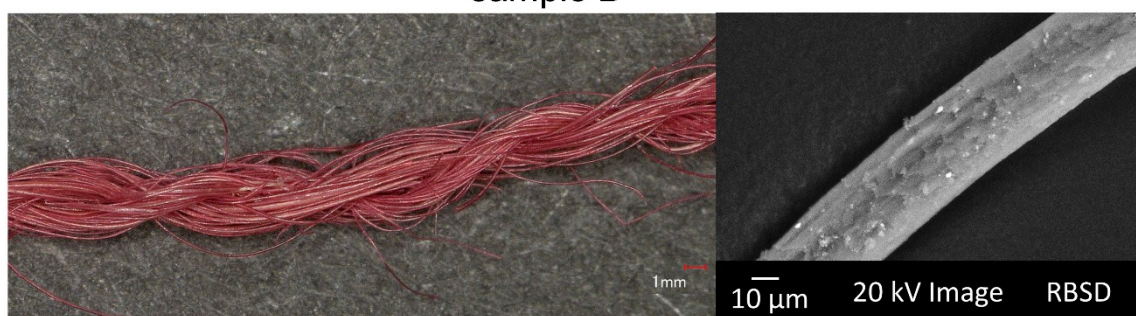

sample C

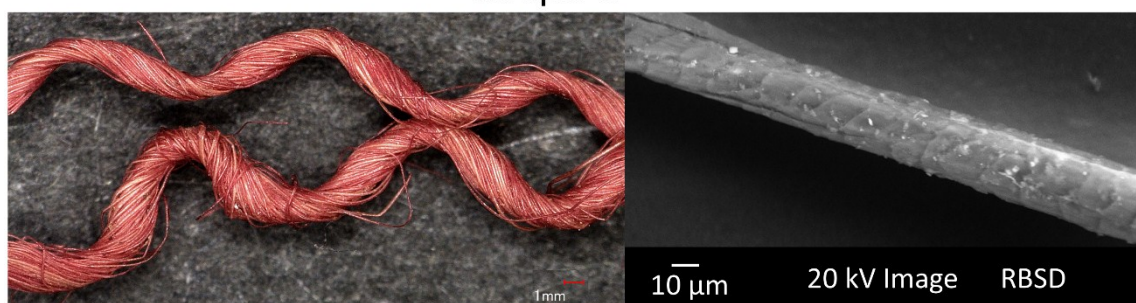

**Fig. S4.** OM (left) and SEM (right) images of historic sample A (wool), B (wool) and C (wool).

sample D

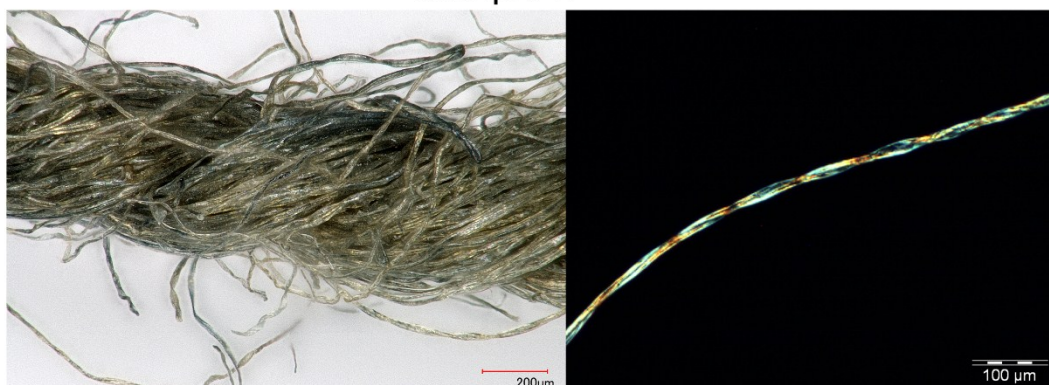

sample E

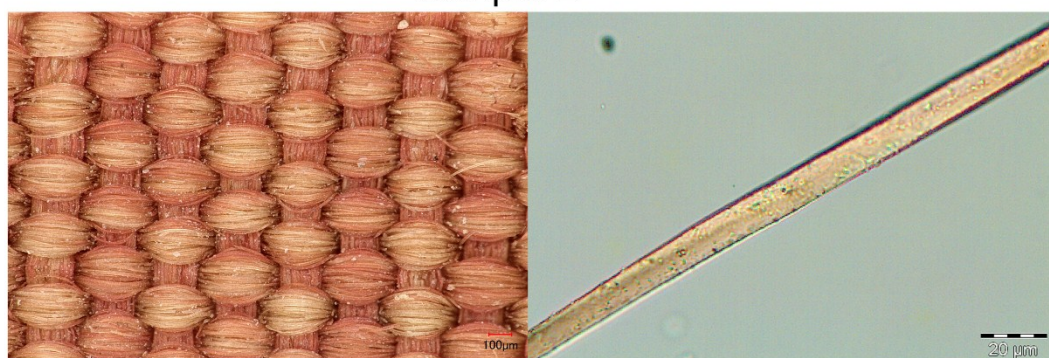

sample F

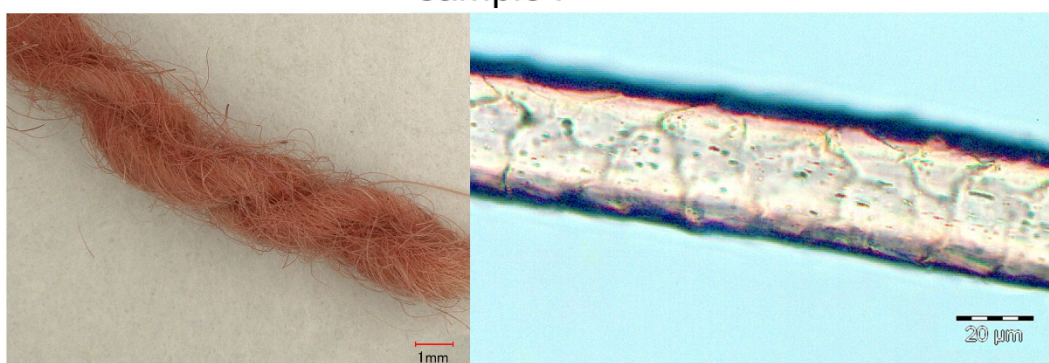

sample G

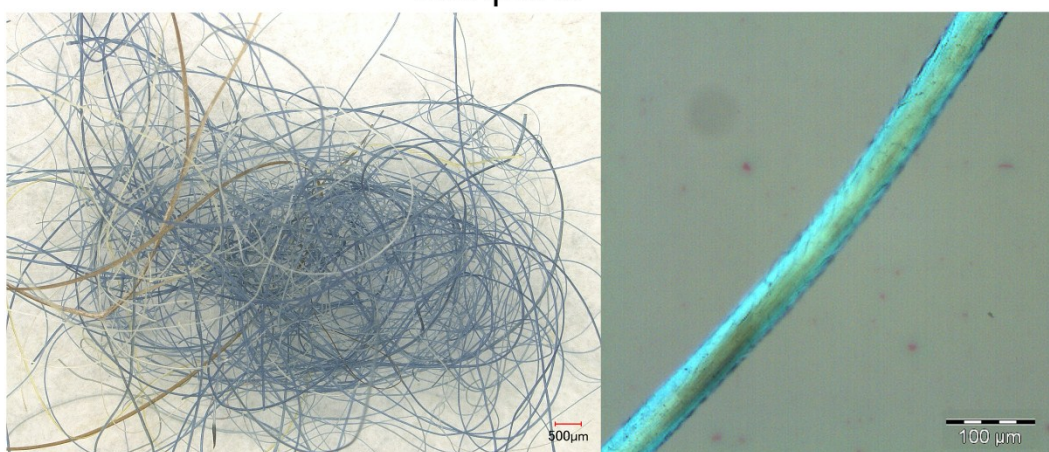

**Fig. S5.** OM images of historic sample D (cotton), E (silk), F (wool) and G (wool).

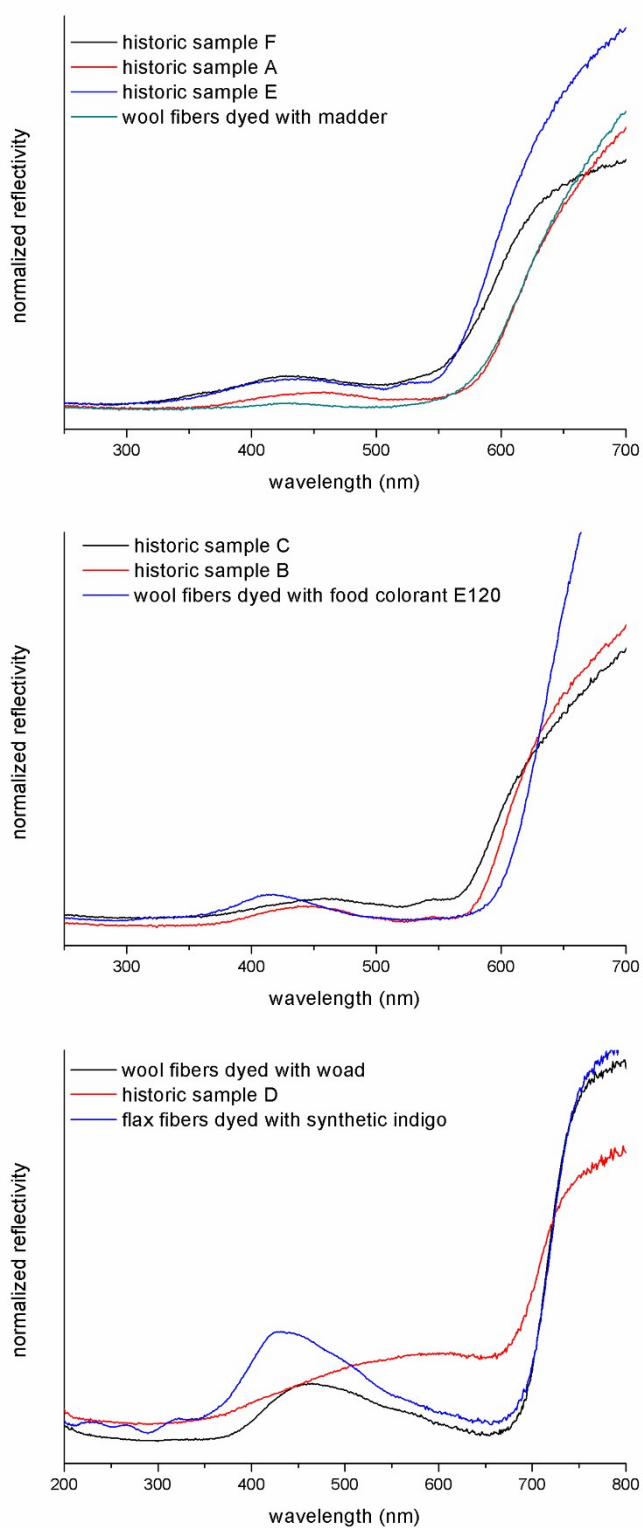

**Fig. S6.** UV-Vis diffuse reflectance spectra of historic samples and reference materials (wool fibers dyed with madder, food colorant E120 or woad and flax fibers dyed with synthetic indigo).

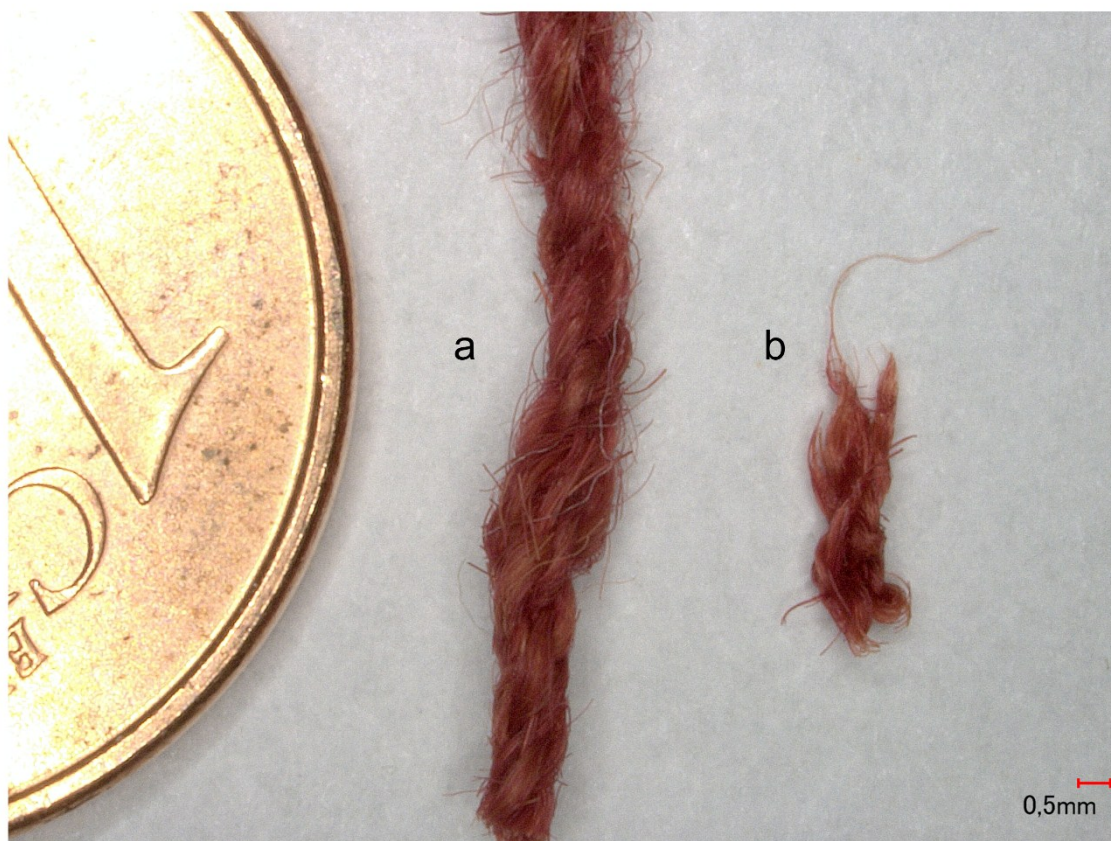

**Fig. S7.** Image of historic sample A: (a) material prior flowprobe™ MS experiments and (b) aliquot (700 µg) used for analysis by flowprobe™ MS (after measurement).

**Tab. S1.** MS data of organic dyestuffs detected in the historic samples A-G by flowprobe™ HRMS, errors (ppm) between calculated and measured  $m/z$  values.

| Substances                              | Detected ions                                                            | $m/z$ values |                    | Error (ppm) |
|-----------------------------------------|--------------------------------------------------------------------------|--------------|--------------------|-------------|
|                                         |                                                                          | calculated   | measured           |             |
| C-glucosides of flavokermesic acid      | $[\text{C}_{22}\text{H}_{19}\text{O}_{12}]^-$<br>$[\text{M-H}]^-$        | 475.0882     | Sample B: 475.0881 | 0.2         |
| C-glucosides of kermesic acid           | $[\text{C}_{22}\text{H}_{19}\text{O}_{13}]^-$<br>$[\text{M-H}]^-$        | 491.0831     | Sample B: 491.0832 | 0.2         |
|                                         |                                                                          |              | Sample C: 491.0837 | 1.2         |
| Dihydroxyanthraquinones                 | $[\text{C}_{14}\text{H}_7\text{O}_4]^-$<br>$[\text{M-H}]^-$              | 239.0350     | Sample A: 239.0348 | 0.8         |
|                                         |                                                                          |              | Sample E: 239.0347 | 1.2         |
|                                         |                                                                          |              | Sample F: 239.0349 | 0.4         |
| Dihydroxyanthraquinone-carboxylic acids | $[\text{C}_{15}\text{H}_7\text{O}_6]^-$<br>$[\text{M-H}]^-$              | 283.0248     | Sample A: 283.0250 | 0.7         |
|                                         |                                                                          |              | Sample E: 283.0249 | 0.4         |
|                                         |                                                                          |              | Sample F: 283.0252 | 1.4         |
| Dihydroxy-methylantraquinones           | $[\text{C}_{15}\text{H}_9\text{O}_4]^-$<br>$[\text{M-H}]^-$              | 253.0506     | Sample A: 253.0506 | 0           |
|                                         |                                                                          |              | Sample C: 253.0506 | 0           |
|                                         |                                                                          |              | Sample E: 253.0505 | 0.3         |
|                                         |                                                                          |              | Sample F: 253.0508 | 0.7         |
| Flavokermesic acid                      | $[\text{C}_{16}\text{H}_9\text{O}_7]^-$<br>$[\text{M-H}]^-$              | 313.0354     | Sample B: 313.0355 | 0.3         |
|                                         |                                                                          |              | Sample C: 313.0358 | 1.3         |
| Indigo/indirubin                        | $[\text{C}_{16}\text{H}_{11}\text{N}_2\text{O}_2]^+$<br>$[\text{M+H}]^+$ | 263.0815     | Sample D: 263.0819 | 1.5         |
|                                         |                                                                          |              | Sample G: 263.0818 | 1.1         |
| Kermesic acid                           | $[\text{C}_{16}\text{H}_9\text{O}_8]^-$<br>$[\text{M-H}]^-$              | 329.0303     | Sample B: 329.0303 | 0           |
|                                         |                                                                          |              | Sample C: 329.0306 | 0.9         |
| Trihydroxyanthraquinones                | $[\text{C}_{14}\text{H}_7\text{O}_5]^-$<br>$[\text{M-H}]^-$              | 255.0298     | Sample A: 255.0299 | 0.4         |
|                                         |                                                                          |              | Sample C: 255.0299 | 0.4         |
|                                         |                                                                          |              | Sample E: 255.0298 | 0           |
|                                         |                                                                          |              | Sample F: 255.0301 | 1.2         |

## References

1. A. Kramell, X. Li, R. Csuk, M. Wagner, T. Goslar, P. E. Tarasov, N. Kreusel, R. Kluge and C.-H. Wunderlich, *Quat. Int.*, 2014, **348**, 214-223.
2. K. Lech, K. Witkoś, B. Wileńska and M. Jarosz, *Anal. Bioanal. Chem.*, 2015, **407**, 855-867.
3. K. Stathopoulou, L. Valianou, A.-L. Skaltsounis, I. Karapanagiotis and P. Magiatis, *Anal. Chim. Acta*, 2013, **804**, 264-272.
